# Supplementary material
Source: PubMed Central journal article supplement (PMC6260955)
Supplement: NIHMS1503412-supplement-2.pdf [file NIHMS1503412-supplement-2.pdf]

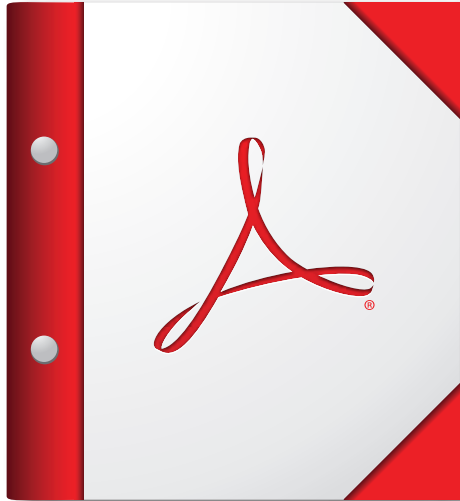

**For the best experience, open this PDF portfolio in  
Acrobat 9 or Adobe Reader 9, or later.**

[Get Adobe Reader Now!](#)
